# Supplementary material
Source: PubMed Central journal article supplement (PMC6350947)

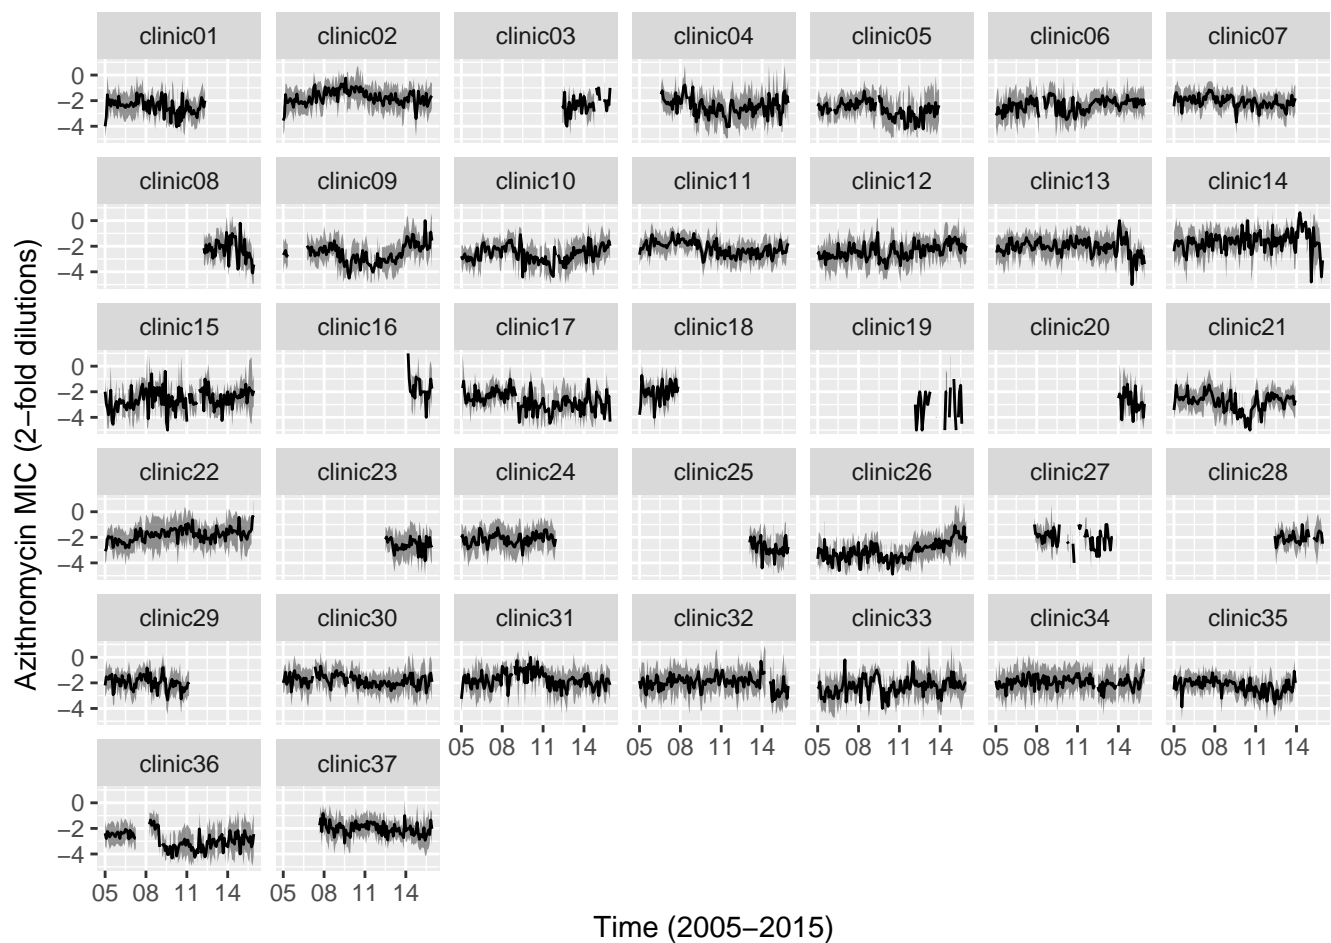

Supplement: jiy551_suppl_supplemental_figure.pdf [file jiy551_suppl_supplemental_figure.pdf]
